# Supplementary material for: A strongly coupled FeS2@TiO2 heterostructure with an island-like structure for high-efficiency lithium storage
Source: Royal Society of Chemistry journal article supplement (doi:10.1039/d4qm00675e), 2025-01-01
Supplement: d4qm00675e1.pdf [file d4qm00675e1.pdf]

## Electronic Supplementary Information

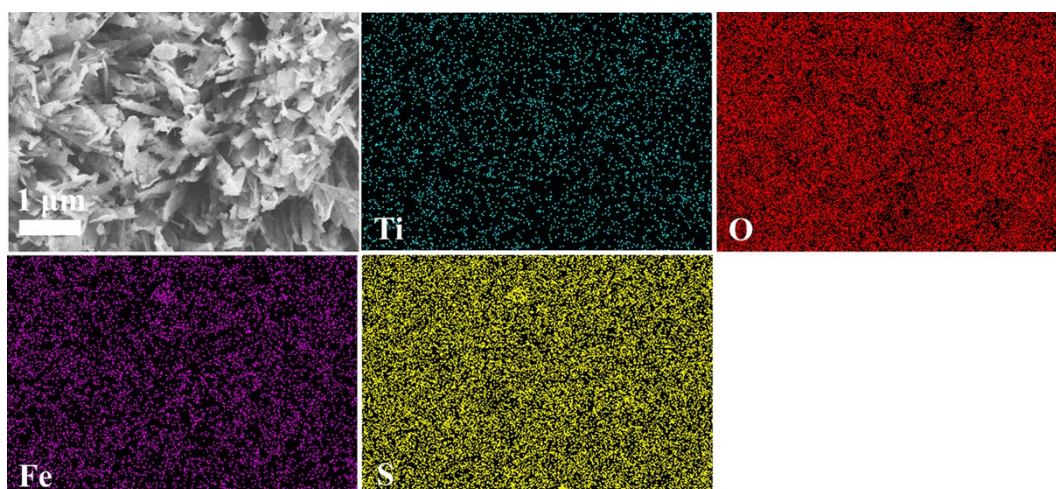

**Fig. S1.** SEM mapping images of FeS<sub>2</sub>@TiO<sub>2</sub> heterostructure.

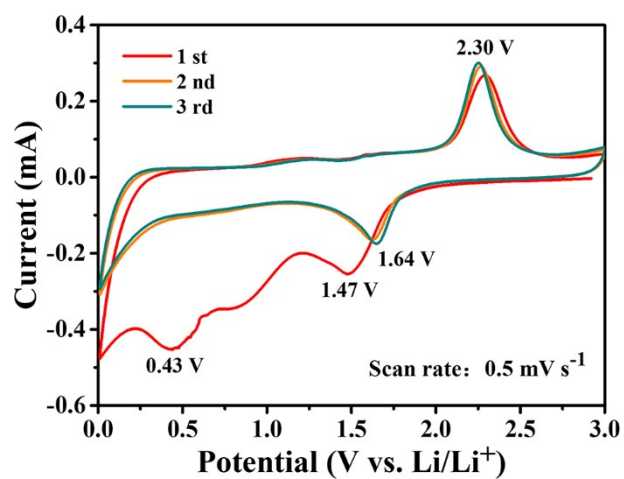

**Fig. S2.** CV curves for the initial three cycles of TiO<sub>2</sub> electrode at 0.5 mV s<sup>-1</sup>.

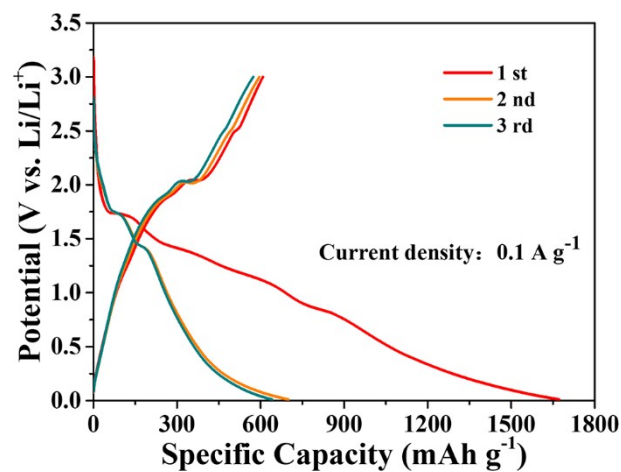

**Fig. S3.** Galvanostatic discharge-charge curves of  $\text{FeS}_2@ \text{TiO}_2$  heterostructure electrode at  $0.1 \text{ A g}^{-1}$ .

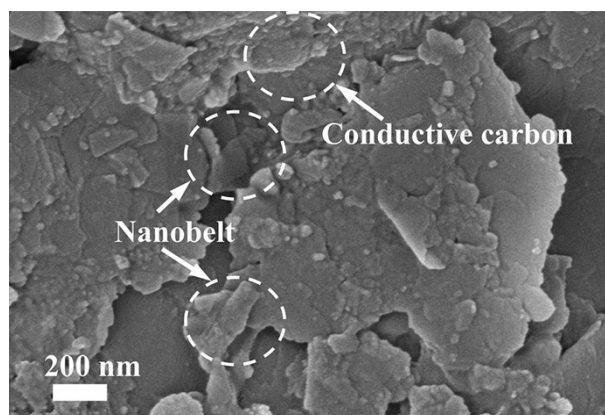

**Fig. S4** SEM image of  $\text{FeS}_2@ \text{TiO}_2$  heterostructure after cycling.

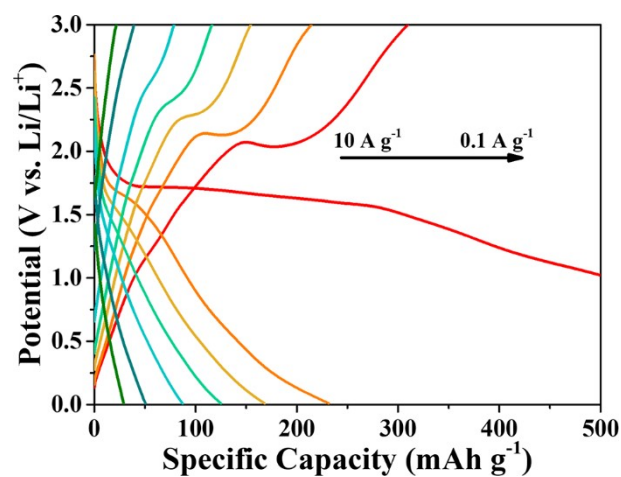

**Fig. S5.** Galvanostatic discharge-charge curves of  $\text{TiO}_2$  electrode under various current densities

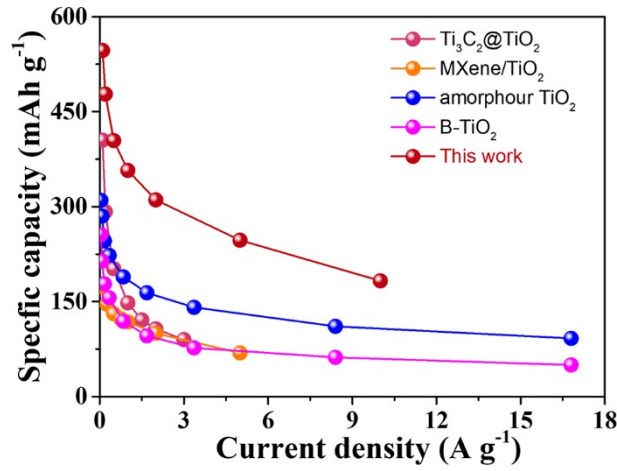

**Fig. S6.** Comparison on the rate performance between this work and other reported  $\text{TiO}_2$ -based anode.

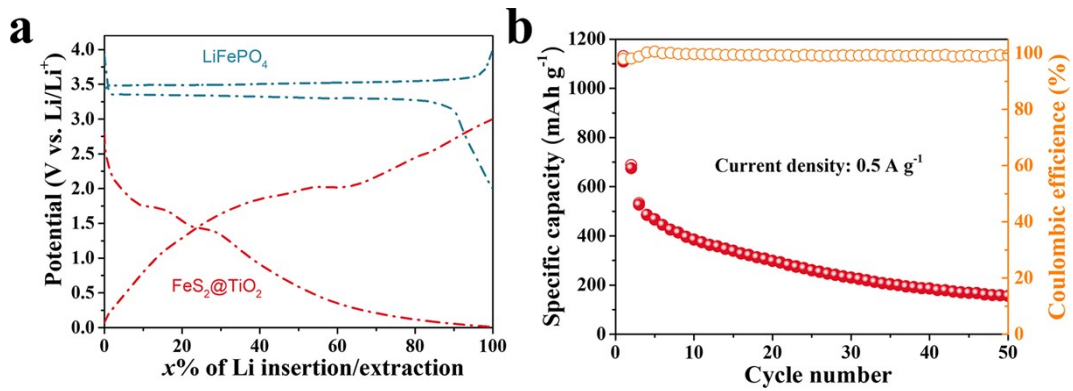

**Fig. S7** (a) charge-discharge curves of  $\text{FeS}_2@TiO_2$  and  $\text{LiFePO}_4$  electrode. (b) Cycling performance of  $\text{FeS}_2@TiO_2||\text{LiFePO}_4$  full cell.

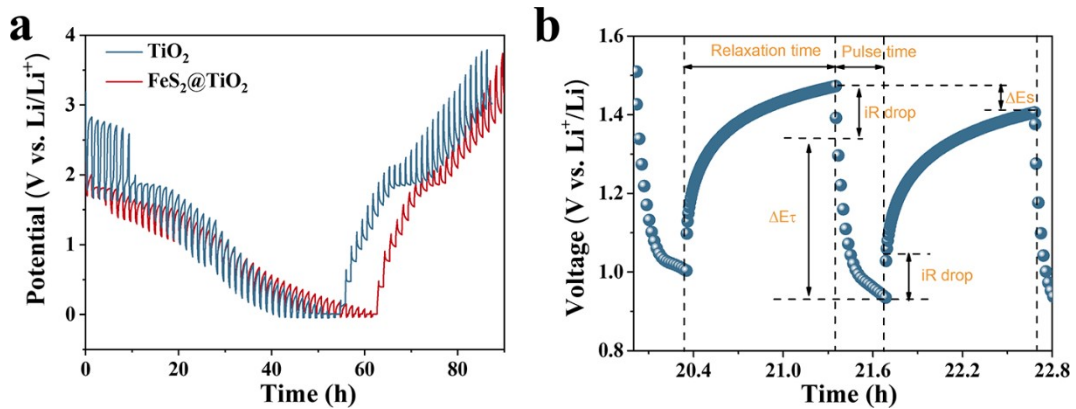

**Fig. S8.** (a) GITT profiles of  $\text{TiO}_2$  and  $\text{FeS}_2@TiO_2$ . (b) Discharge profiles of  $\text{FeS}_2@TiO_2$  electrode for a single GITT during discharge process.

**Table S1** ICP analysis of FeS<sub>2</sub>@TiO<sub>2</sub> heterojunction.

| Sample                             | Fe (wt.%) | Ni (wt.%) |
|------------------------------------|-----------|-----------|
| FeS <sub>2</sub> @TiO <sub>2</sub> | 2.95      | 26.4      |

**Table S2** Fitting results of EIS with the proposed equivalent circuit.

| Materials                          | $R_s$ ( $\Omega$ ) | $R_{ct}$ ( $\Omega$ ) | $\sigma$ ( $\Omega \text{ cm}^2 \text{ s}^{-1/2}$ ) |
|------------------------------------|--------------------|-----------------------|-----------------------------------------------------|
| TiO <sub>2</sub>                   | 5.68               | 972.4                 | 32.1                                                |
| FeS <sub>2</sub> @TiO <sub>2</sub> | 2.81               | 421.0                 | 31.6                                                |
